# Supplementary material for: Case Report: Cytomegalovirus Disease Is an Under-Recognized Contributor to Morbidity and Mortality in Common Variable Immunodeficiency
Source: PubMed Central journal article supplement (PMC8885594; doi:10.3389/fimmu.2022.815193), 2022-02-15
Supplement: DataSheet_1.pdf [file DataSheet_1.pdf]

**Table 1S.** CVID<sup>+</sup>/CMV<sup>-</sup> cohort: clinical characteristics.

| PATIENT | AGE/<br>GENDER | GENETIC DIAGNOSIS                | AGE OF CVID<br>SYMPTON ONSET | AGE AT CVID<br>DIAGNOSIS/ | INFLAMMATORY<br>DISEASE <sup>#</sup>            | IATROGENIC<br>IMMUNOSUPPRESSION | INFECTIONS                                                                |
|---------|----------------|----------------------------------|------------------------------|---------------------------|-------------------------------------------------|---------------------------------|---------------------------------------------------------------------------|
| 7       | 35M            | No pathogenic variant identified | 25                           | 34                        | Nil                                             | Nil                             | Recurrent sinopulmonary & soft tissue infections                          |
| 8       | 62F            | No pathogenic variant identified | 31                           | 45                        | Lymphadenopathy                                 | Nil                             | Recurrent sinopulmonary infections, small intestinal bacterial overgrowth |
| 9       | 33F            | <i>NFKB1</i> :<br>c.730+4A>G     | 16                           | 29                        | Lymphocytic enteropathy,<br>mild bronchiectasis | Nil                             | Recurrent sinopulmonary infections                                        |

<sup>#</sup> Inflammatory disease defined as the presence of autoimmune cytopenias, autoimmune haemolytic anaemia (AIHA), enteropathy, lymphadenopathy/splenomegaly, lymphoproliferative disease, interstitial lung disease or seronegative spondyloarthritis, WES: Whole Exome Sequencing.

**Table 2S.** CVID<sup>+</sup>/CMV<sup>-</sup> cohort: immunological characteristics.

|                                                                      | <b>Patient 7</b> | <b>Patient 8</b> | <b>Patient 9</b> |
|----------------------------------------------------------------------|------------------|------------------|------------------|
| <b>Total lymphocyte count</b> , cells x 10 <sup>9</sup> , [1.0-4.8]* | 1.8              | 6.7              | 3.2              |
| <b>CD19+</b> , cells x 10 <sup>9</sup> , [0.07-0.55]                 | <b>0.02</b>      | 1.52             | 0.72             |
| <b>CD3+</b> , cells x 10 <sup>9</sup> , [0.60-2.50]                  | 1.64             | <b>4.93</b>      | 2.07             |
| <b>CD4+</b> , cells x 10 <sup>9</sup> , [0.45-1.70]                  | 1.02             | 3.88             | 1.41             |
| <b>CD8+</b> , cells x 10 <sup>9</sup> , [0.20-1.15]                  | 0.59             | 0.91             | 0.56             |
| <b>CD4:CD8</b> , [1.1-2.4]                                           | 1.74:1           | <b>4.27:1</b>    | 2.49:1           |
| <b>CD56+</b> , cells x 10 <sup>9</sup> , [0.07-0.70]                 | 0.16             | 0.19             | 0.32             |

\*[reference range]; values outside reference range in **bold**.
